# Supplementary material
Source: MDPI journal article supplement (https://www.mdpi.com/2073-4468/12/2/26)
Supplement: s1 [file s1]

**Supplement Table S1. Demographic Characteristics, RA based on seropositivity to R. Factor, combinational Therapy-treatment regimens.**

[illegible]
